# Supplementary material
Source: Springer Nature journal article supplement (https://www.springermedizin.de/resource/supplementary/13020_2009_67_MOESM3_ESM.pdf/9640994)

(-a)

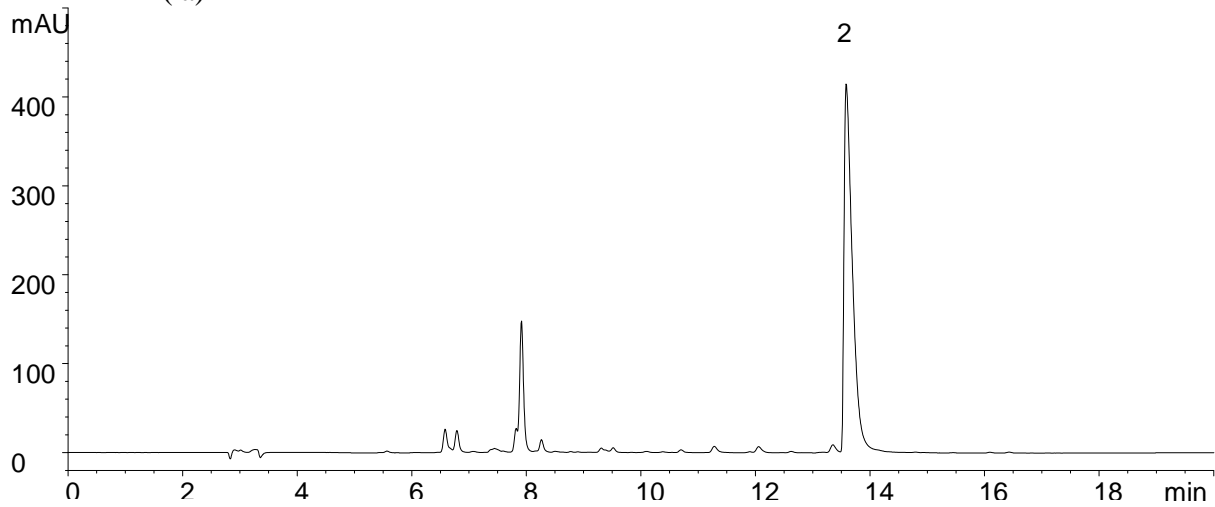

(-b-)

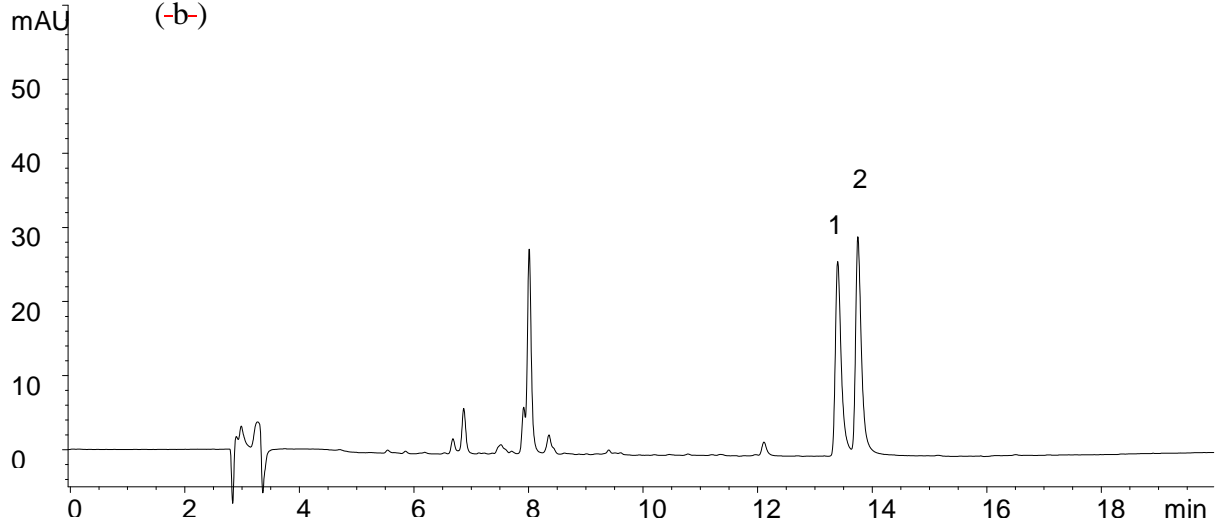

Supplement: MOESM3 [file 9640994]
